# Supplementary material for: Impact of nitrogen configuration on the electronic properties of tailored triphenylamine derivatives as hole transport materials for perovskite solar cells: a computational chemistry study
Source: Royal Society of Chemistry journal article supplement (doi:10.1039/d4cp04368e), 2025-01-01
Supplement: d4cp04368e1.pdf [file d4cp04368e1.pdf]

## Supplementary Information

# Impact of Nitrogen Configuration on the Electronic Properties of Tailored Triphenylamine Derivatives as Hole Transport Materials for Perovskite Solar Cells: A Computational Chemistry Study

*Raul Flores, Nora Aydeé Sánchez-Bojorge, Juan Pedro Palomares-Báez\*, Linda-Lucila Landeros-Martínez and Luz María Rodríguez-Valdez\**

Laboratorio de Química Computacional, Facultad de Ciencias Químicas, Universidad Autónoma de Chihuahua, Circuito Universitario S/N, Campus UACH II, Chihuahua, Chihuahua, C.P. 31125, México; E-mail: [lmrodrig@uach.mx](mailto:lmrodrig@uach.mx), [ppalomares@uach.mx](mailto:ppalomares@uach.mx)

**Table SI 1.** Electronic couplings of n-TPAM dimers calculated with  $\omega$ -opt-B97X-3c/6-311G(d,p) and  $\omega$ -opt-B97X-3c/vDZP. Reorganisation energies of n-TPAM, YZ22, and YZ18 molecules located with CREST. The complete DFT-CP methods deposited on Zenodo at <https://doi.org/10.5281/zenodo.11391494>

| $\pi$ -linker | conformer | $J_{\text{eff}}(\text{h})$ meV |                      | <i>se</i> | <i>ss</i> |
|---------------|-----------|--------------------------------|----------------------|-----------|-----------|
|               |           | $\omega$ B97X-3c               | $\omega$ 6-311G(d,p) |           |           |
| A             | 1         | 144.13                         | 142.95               |           |           |
|               | 2         | 124.47                         | 123.42               |           |           |
|               | 3         | 109.25                         | 108.12               |           |           |
|               | 4         | 38.21                          | 37.69                |           |           |
|               | 5         | 22.74                          | 22.79                |           |           |
| B             | 1         | 157.24                         | 155.57               |           |           |
|               | 2         | 150.38                         | 148.64               |           |           |
|               | 3         | 109.68                         | 108.96               |           |           |
|               | 4         | 107.73                         | 107.43               |           |           |
|               | 5         | 39.55                          | 34.06                |           |           |
| C             | 2         | 147.39                         | 146.33               |           |           |
|               | 1         | 145.17                         | 144.26               |           |           |
|               | 3         | 123.95                         | 123.02               |           |           |
|               | 4         | 4.53                           | 4.82                 |           |           |
| D             | 1         | 161.38                         | 159.98               |           |           |
|               | 2         | 161.35                         | 158.88               |           |           |
|               | 3         | 45.04                          | 45.98                |           |           |
|               | 4         | 16.04                          | 16.98                |           |           |
| E             | 2         | 155.12                         | 153.98               |           |           |
|               | 1         | 148.99                         | 147.88               |           |           |
|               | 3         | 112.71                         | 110.80               |           |           |
|               | 4         | 43.34                          | 43.59                |           |           |
| F             | 2         | 161.55                         | 160.41               |           |           |
|               | 1         | 159.30                         | 158.27               |           |           |
|               | 3         | 39.58                          | 39.90                |           |           |

**Table SI 2.** Reorganisation energies of n-TPAM, YZ22, and YZ18 calculated with  $\omega$ -opt-B97X-3c/vDZP,  $\omega$ -opt-B97X-3c/6-311G(d,p) and M06/6-311G(d,p)

|        | $\omega$ -opt-B97X-3c |             | M06         |
|--------|-----------------------|-------------|-------------|
|        | vDZP                  | 6-311G(d,p) | 6-311G(d,p) |
| A-TPAM | 346.31                | 320.60      | 189.92      |
| B-TPAM | 268.76                | 271.03      | 191.70      |
| C-TPAM | 283.34                | 279.53      | 183.05      |
| D-TPAM | 321.84                | 311.21      | 185.83      |
| E-TPAM | 304.07                | 302.56      | 174.66      |
| F-TPAM | 291.25                | 302.54      | 161.32      |
| YZ22   | 149.78                | 148.91      | 128.20      |
| YZ18   | 187.81                | 179.51      | 133.80      |

|        |                                                                                     |                                                                                     |                                                                                      |                                                                                       |
|--------|-------------------------------------------------------------------------------------|-------------------------------------------------------------------------------------|--------------------------------------------------------------------------------------|---------------------------------------------------------------------------------------|
| A-TPAM | 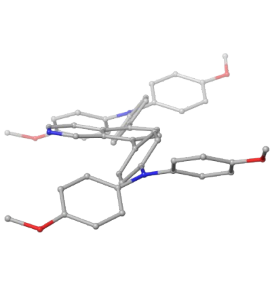   |    |    |    |
| B-TPAM |    |    |    |    |
| C-TPAM |   |   |   |   |
| D-TPAM |  |  |  |  |
| E-TPAM |  |  |  |  |

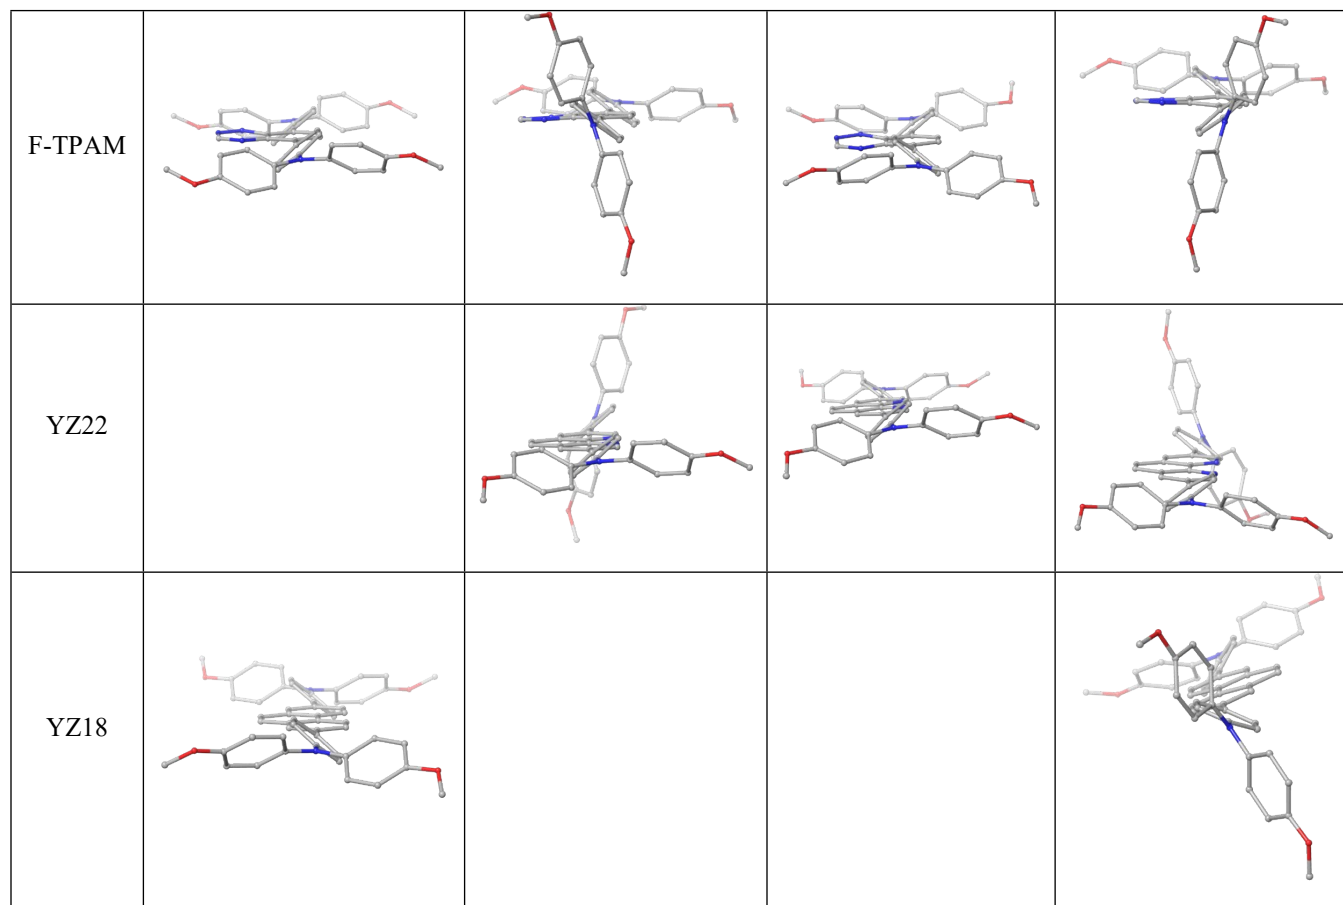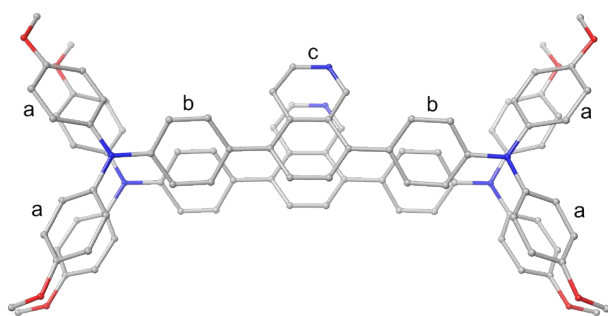

**Figure SI 1.** Labelling of  $\pi$ - $\pi$  stacked rings of n-TPAM, YZ18, and YZ22 dimers.

**Table SI 4.** Average distance between ring centres ( $R_c$ ) of  $\pi$ - $\pi$  stacked rings obtained from geometry optimisation at the dftb3-3ob-MBD level of theory; a, b, and c correspond to the Figure SI 1 labelling.

| conformer | a | b | c |
|-----------|---|---|---|
|-----------|---|---|---|

|        |   |      |      |      |                                                                                       |                                                                                       |
|--------|---|------|------|------|---------------------------------------------------------------------------------------|---------------------------------------------------------------------------------------|
| A-TPAM | 1 | 4.25 | 4.00 | 3.93 |    |    |
|        | 2 | 4.26 | 4.07 | 4.11 |    |    |
|        | 3 | 4.18 | 4.49 | 4.71 |    |    |
|        | 4 | 4.19 | 4.15 | 4.38 |    |                                                                                       |
|        | 5 | 3.94 |      | 3.60 |                                                                                       |                                                                                       |
| B-TPAM | 1 | 4.22 | 3.96 | 3.74 |  |  |
|        | 2 | 4.22 | 4.00 | 4.04 |  |  |
|        | 3 | 4.27 | 4.16 | 3.86 |                                                                                       |  |
|        | 4 | 4.23 | 3.96 | 3.70 |                                                                                       |                                                                                       |

---

|  |   |      |      |      |                                                                                     |                                                                                     |
|--|---|------|------|------|-------------------------------------------------------------------------------------|-------------------------------------------------------------------------------------|
|  |   |      |      |      |  |  |
|  | 5 | 4.18 | 4.22 | 3.87 |                                                                                     |                                                                                     |
|  |   |      |      |      |  |  |

---

C-TPAM

|  |   |      |      |      |                                                                                       |                                                                                       |
|--|---|------|------|------|---------------------------------------------------------------------------------------|---------------------------------------------------------------------------------------|
|  | 1 | 4.27 | 3.93 | 3.72 |                                                                                       |                                                                                       |
|  |   |      |      |      |    |    |
|  | 2 | 4.28 | 3.95 | 3.96 |                                                                                       |                                                                                       |
|  |   |      |      |      |    |    |
|  | 3 | 4.41 | 4.04 | 3.64 |                                                                                       |                                                                                       |
|  |   |      |      |      |  |  |
|  |   |      |      |      |  |  |
|  | 4 |      |      | 3.51 |                                                                                       |                                                                                       |
|  |   |      |      |      |  |  |

---

D-TPAM

|  |   |      |      |      |                                                                                       |                                                                                       |
|--|---|------|------|------|---------------------------------------------------------------------------------------|---------------------------------------------------------------------------------------|
|  | 1 | 4.22 | 3.92 | 3.61 |                                                                                       |                                                                                       |
|  |   |      |      |      |  |  |
|  | 2 | 4.26 | 3.88 | 3.91 |                                                                                       |                                                                                       |
|  |   |      |      |      |  |  |
|  | 3 |      |      |      |                                                                                       |                                                                                       |

---

|        |       |      |      |      |                                                                                       |                                                                                     |                                                                                       |
|--------|-------|------|------|------|---------------------------------------------------------------------------------------|-------------------------------------------------------------------------------------|---------------------------------------------------------------------------------------|
|        |       |      |      |      |    |  |    |
|        | 4     |      |      |      |    |                                                                                     |    |
|        | <hr/> |      |      |      |                                                                                       |                                                                                     |                                                                                       |
|        | 1     | 4.24 | 3.97 | 3.72 |    |                                                                                     |    |
|        | 2     | 4.26 | 3.90 | 3.59 |    |                                                                                     |    |
| E-TPAM | 3     | 4.20 | 4.02 | 3.83 |  |                                                                                     |  |
|        | 4     | 4.15 | 4.11 | 4.03 |  |                                                                                     |  |
|        | 1     | 4.21 | 3.94 | 3.58 |  |                                                                                     |  |
| F-TPAM | 2     | 4.21 | 4.30 | 3.90 |  |                                                                                     |  |
|        | <hr/> |      |      |      |                                                                                       |                                                                                     |                                                                                       |
|        | 3     |      |      |      |                                                                                       |                                                                                     |                                                                                       |
|        | <hr/> |      |      |      |                                                                                       |                                                                                     |                                                                                       |

|         |      |      |      |
|---------|------|------|------|
| Average | 4.22 | 4.05 | 3.86 |
|---------|------|------|------|

**Table SI 5.** Geometrical characteristics of YZ18, YZ22, and n-TPAM dimers calculated with r2scan-3c/def2-mTZVPP geometry optimisations.

| cnf  |   | $R_c$     |           | $\theta_a$ |           |
|------|---|-----------|-----------|------------|-----------|
|      |   | r2scan-3c | Dftb3-MBD | r2scan-3c  | Dftb3-MBD |
| A    | s | 4.40      | 4.18      | 21.0       | 4.6       |
|      | e | 4.30      | 4.10      | 28.9       | 3.8       |
| B    | s | 4.32      | 4.12      | 25.6       | 3.8       |
|      | e | 4.23      | 4.04      | 24.7       | 4.4       |
| C    | s | 4.43      | 4.12      | 25.6       | 4.1       |
|      | e | 4.39      | 4.05      | 26.3       | 3.3       |
| D    | s | 4.26      | 4.08      | 21.7       | 3.2       |
|      | e | 4.21      | 3.99      | 18.1       | 3.9       |
| E    | s | 4.38      | 4.21      | 26.5       | 4.8       |
|      | e | 4.23      | 4.04      | 26.2       | 4.0       |
| F    | s | 4.33      | 4.16      | 27.2       | 4.1       |
|      | e | 4.19      | 3.99      | 23.0       | 4.3       |
| YZ22 | s | 4.22      | 4.01      | 24.1       | 3.8       |
|      | e | 4.31      | 3.97      | 19.8       | 3.3       |
| YZ18 | e | 4.26      | 3.98      | 22.5       | 3.8       |
|      | s | 4.24      | 4.00      | 22.5       | 4.4       |

<sup>a</sup>Average angle between the planes of the  $\pi$ - $\pi$  stacked rings of end-cap TPAM



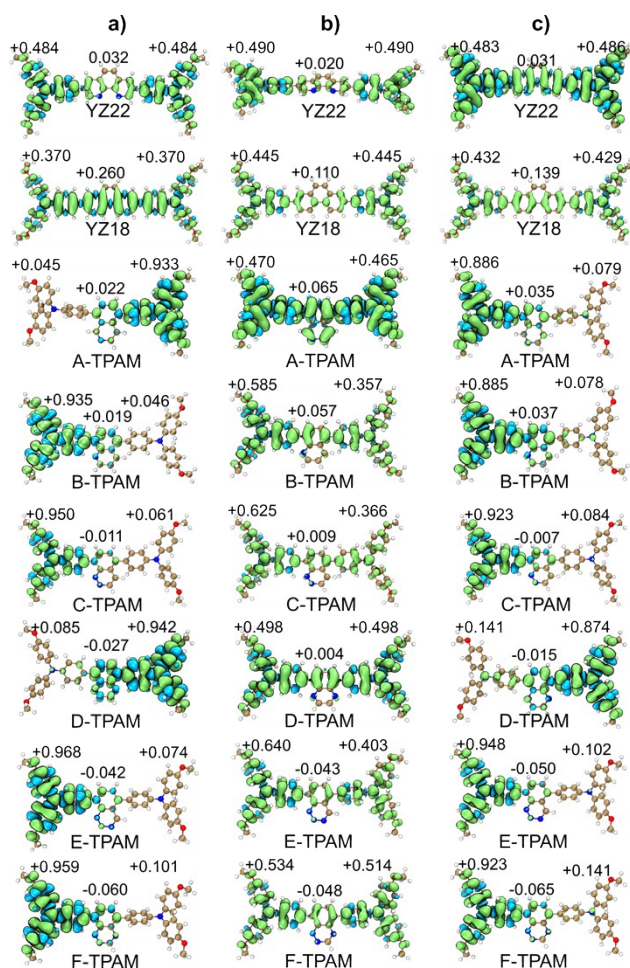

**Figure SI 2** Contour plots of electron spin densities and MBIS fragment charge populations of cation n-TPAM, YZ22, and YZ18. The numbers on the left and right of each contour plot indicate the TPAM fragment charge, and the number in the middle is the core charge. a)  $\omega$ B97X-3c/vDZP b) M06/6-311G(d,p) c)  $\omega$ -opt-B97X-3c/vDZP

**Table SI 6.** Wavelength of the lowest energy excitation ( $\lambda_{\max}$ ), oscillator strength, and the HOMO(H0)-LUMO(L0) transitions of n-TPAM, YZ22, and YZ18 calculated with  $\omega$ -opt-B97X-3c/vDZP

|        | $\lambda_{\max}$ (nm) | Oscillator strength(f) | H0 $\rightarrow$ L0 electronic transitions (%) |
|--------|-----------------------|------------------------|------------------------------------------------|
| A-TPAM | 331.4                 | 1.2221                 | 67.3                                           |
| B-TPAM | 349.9                 | 0.9950                 | 72.2                                           |
| C-TPAM | 412.1                 | 0.1160                 | 19.3                                           |
| D-TPAM | 385.7                 | 0.6913                 | 78.9                                           |
| E-TPAM | 394.3                 | 0.7514                 | 75.2                                           |
| F-TPAM | 470.6                 | 0.0398                 | 6.7                                            |
| YZ18   | 329.6                 | 2.4885                 | 62.1                                           |
| YZ22   | 336.2                 | 2.3432                 | 64.0                                           |

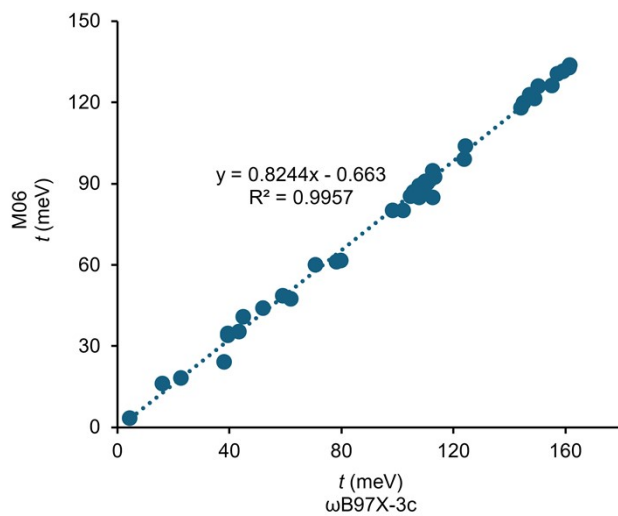

**Figure SI 3** Scatter plot of the correlation coefficient ( $R^2 = 0.9957$ ) between the charge transfer integral ( $t$ ) computed with  $\omega$ B97X-3c/vDZP and M06/6-311G(d,p) functionals using the DIPRO method.

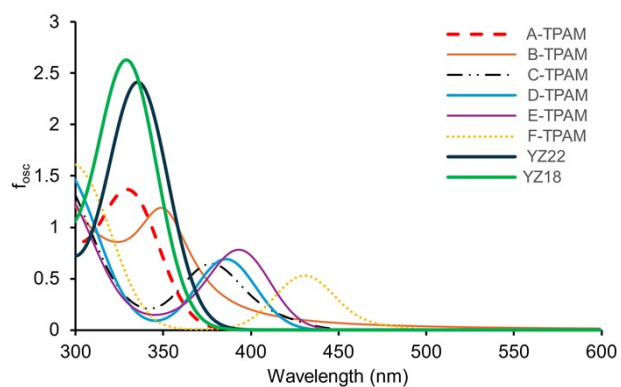

**Figure SI 4** UV-Vis absorption spectrum of n-TPAM, YZ22, and YZ18 molecules computed using 40 roots with TD-DFT  $\omega$ -opt-B97X-3c/vDZP.
